# Supplementary material
Source: PubMed Central journal article supplement (PMC3463350)
Supplement: supp_M112.373274_jbc.M112.373274-1.pdf [file supp_M112.373274_jbc.M112.373274-1.pdf]

## Supplemental Figure Legends:

**Supplemental Figure 1: Schematic showing the structure of the C/EBP $\alpha$  mRNA.** The C/EBP $\alpha$  gene is intronless and generates two isoforms as a result of the differential utilization of alternate translation start codons. The resultant p42kD (full length) and p30kD (truncated) C/EBP $\alpha$  proteins differ from each other at the N-terminus. Translational control of C/EBP $\alpha$  isoform expression occurs via a conserved cis-regulatory uORF (upstream open reading frame) in the 5'UTR (untranslated region) that is out of frame with the coding region of C/EBP $\alpha$  and is thought to be responsive to the activities of the translation initiation factors eIF4E and eIF2. When levels of these factors are high, the out-of-frame uORF (red AUG) is translated, but termination of its translation very close to the translational start site (AUG) for p42 is thought to prevent re-initiation at the p42 AUG. Instead, ribosomes continue to scan and reinitiate at a downstream AUG, resulting in the expression of C/EBP $\alpha$  p30. In contrast, under basal conditions, when levels of the initiation factors are relatively low, most ribosomes do not initiate translation at the uORF but instead initiate translation at the p42 AUG by a process involving “leaky ribosome scanning”, resulting in translation of the full length C/EBP $\alpha$  p42 isoform. The translation initiation AUG codon of a putative shorter C/EBP $\alpha$  isoform shown in Figure 4C is also indicated (see dashed red arrow). TEI, II and III are activation domains, bzip: basic-leucine zipper DNA binding domain.

**Supplemental Figure 2: Expression levels of C/EBP $\alpha$  p30 and p42 in HEK293 cells.** A. Expression plasmids for C/EBP $\alpha$  p30 and p42 were transfected into HEK293 cells. 24 hours post-transfection cell lysates were prepared and subjected to western blot analysis. The blot was probed sequentially for C/EBP $\alpha$  N-terminal and C-terminal recognizing antibodies and  $\beta$ -actin. Note: C/EBP $\alpha$ p30 was recognized only when the C/EBP $\alpha$  C-terminus antibody was used but not with the N-terminal antibody. C/EBP $\alpha$ p42 was recognized by both antibodies.

**Supplemental Figure 3: Transient transfection analysis of a C/EBP-Luciferase reporter (2x) with expression plasmids for C/EBP $\alpha$  p42 and C/EBP $\alpha$  p30 in HEK293T cells.** Transient transfection analysis was conducted using a C/EBP-reporter plasmid (2x) harboring tandem C/EBP sites and C/EBP $\alpha$  expression plasmids. HEK293T cells were transiently cotransfected with 2x and expression plasmids for C/EBP $\alpha$  p42 (wild-type) alone or with increasing concentration of C/EBP $\alpha$  p30 (truncated). Normalized luciferase (to that of a cotransfected  $\beta$ -galactosidase expression plasmid) values have been represented as a fold change over the enzyme activity of 2x reporter plasmid alone (equal to 1). The figure represents normalized mean $\pm$  s.e. obtained from an experiment performed in triplicate. Increasing concentrations of the p30 isoform significantly reduced the transactivation activity of the wildtype isoform.

**Supplemental Figure 4: Expression levels of GM-CSFR and G-CSFR in MNPM1<sup>+/+</sup> and <sup>+/-</sup> cells.** Expression levels of GM-CSFR and G-CSFR were measured using real time PCR analysis using cDNA derived from total RNA from uninduced and 48 hour GM-CSF-induced MNPM1<sup>+/+</sup> and MNPM1<sup>+/-</sup> cell lines. Expression levels were normalized to that of  $\beta$  actin, calculated by the delta-delta Ct method and represented as a fold change over the expression in NPM1<sup>+/+</sup> cells. The expression of each gene was measured in triplicate and S.E. values have been indicated. While expression levels of the GM-CSFR remained unchanged between the two cell lines, levels of the G-CSFR were reduced in NPM1<sup>+/-</sup> +GM-CSF treated cells.

**Supplemental Figure 5: Adding an NPM1 expression plasmid back into NPM1 haploinsufficient cells restores neutrophil specific gene expression.** MNPM1<sup>+/-</sup> cells were nucleofected with empty vector or an NPM1 expression plasmid. 48 hours post-transfection, total RNA was isolated, converted to cDNA and subjected to qRT-PCR analysis using gene specific oligomers. Expression levels have been normalized to that of  $\beta$ -actin and calculated using the delta-delta Ct method. Fold change in expression

has been calculated for each gene by assuming its expression in vector transfected cells is 1. Note: that NPM1 reexpression restores expression of the same myeloid genes as C/EBP $\alpha$ p42 (Figure 5).

**Supplemental Table 1: Sequences of Oligonucleotides used in q-RT-PCR analysis.**

Supplemental Figure 1

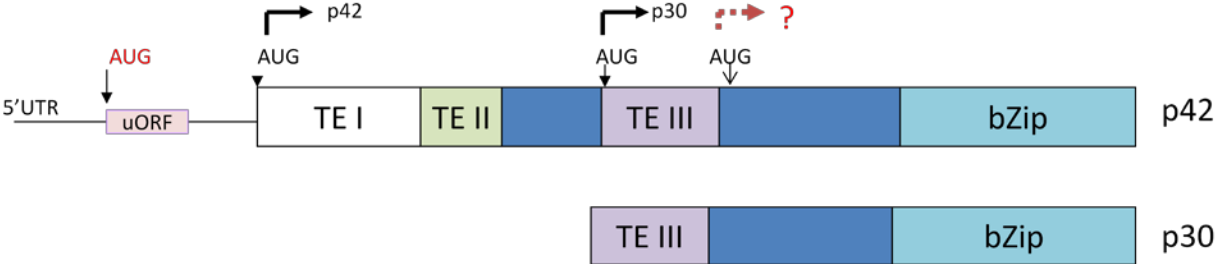

Supplemental Figure 2

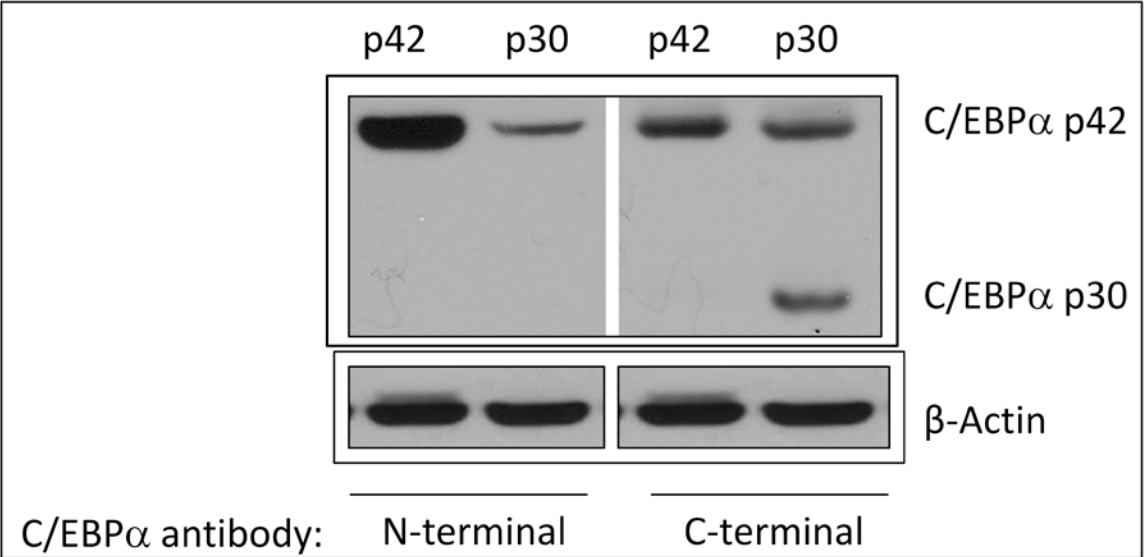

Supplemental Figure 3:

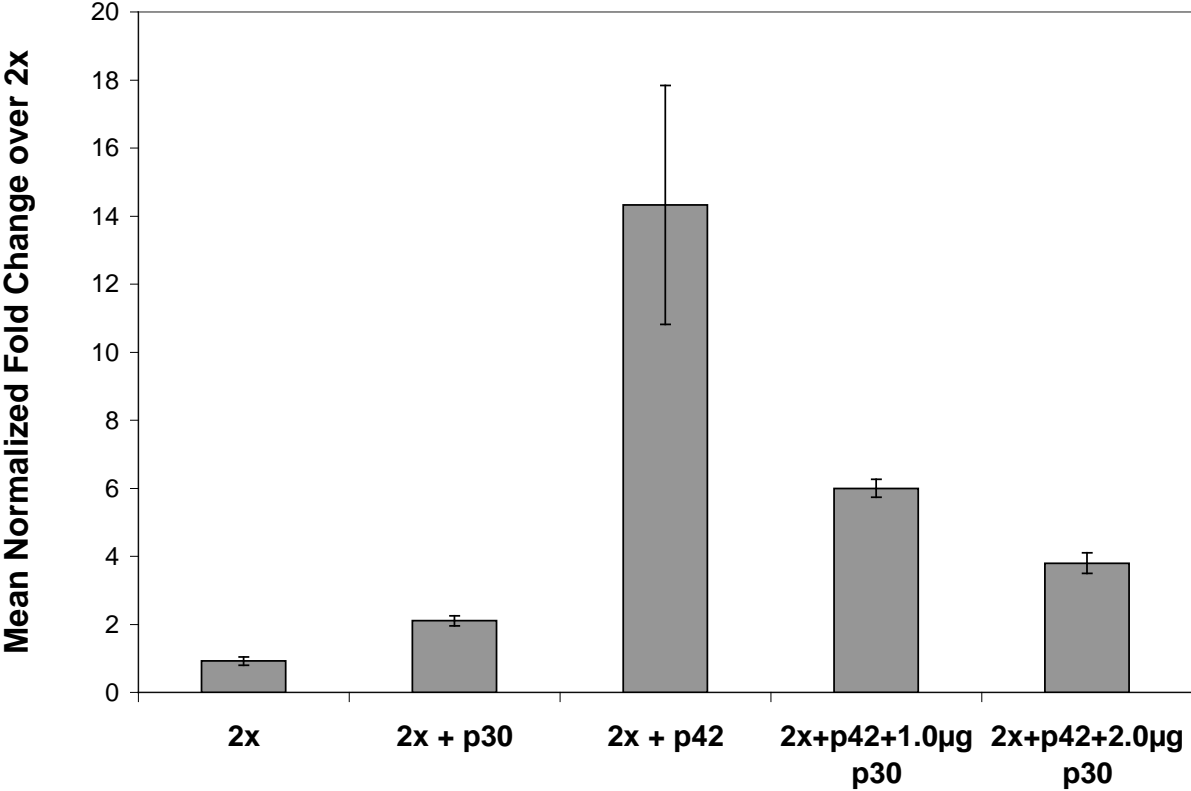

Supplemental Figure 4:

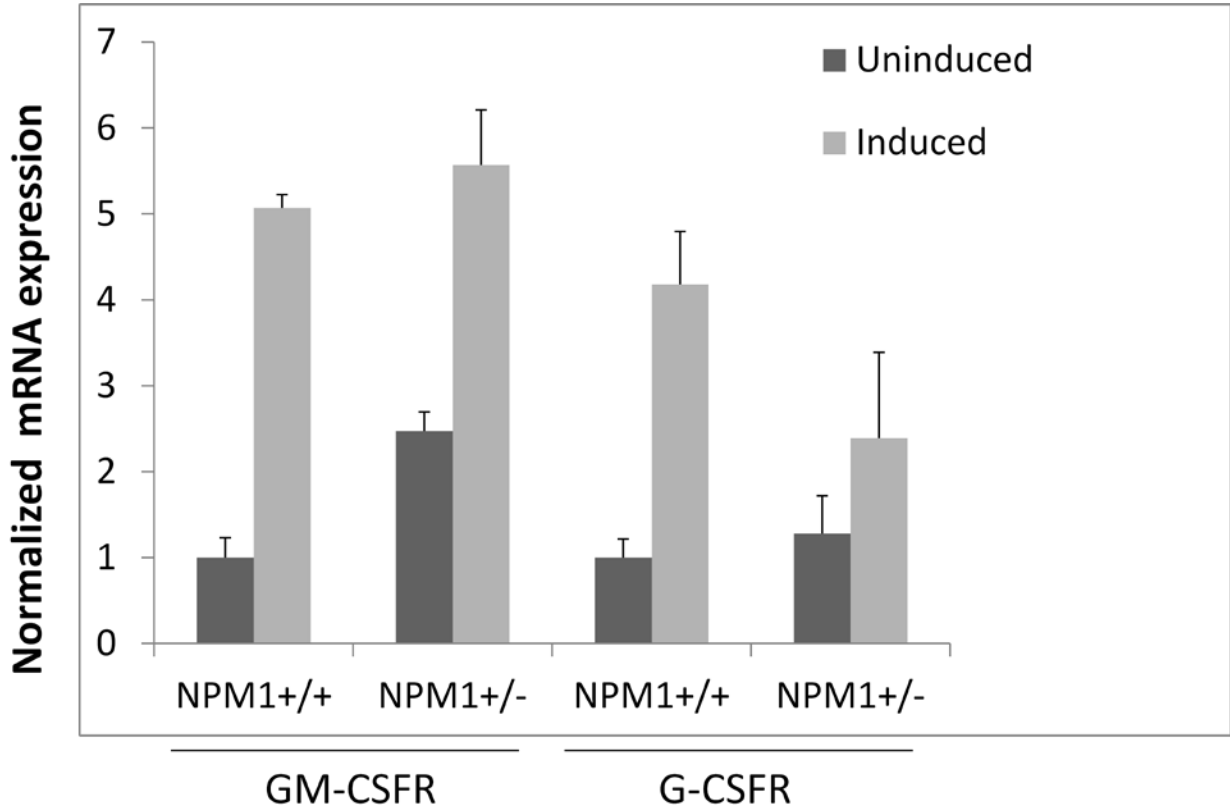

Supplemental Figure 5

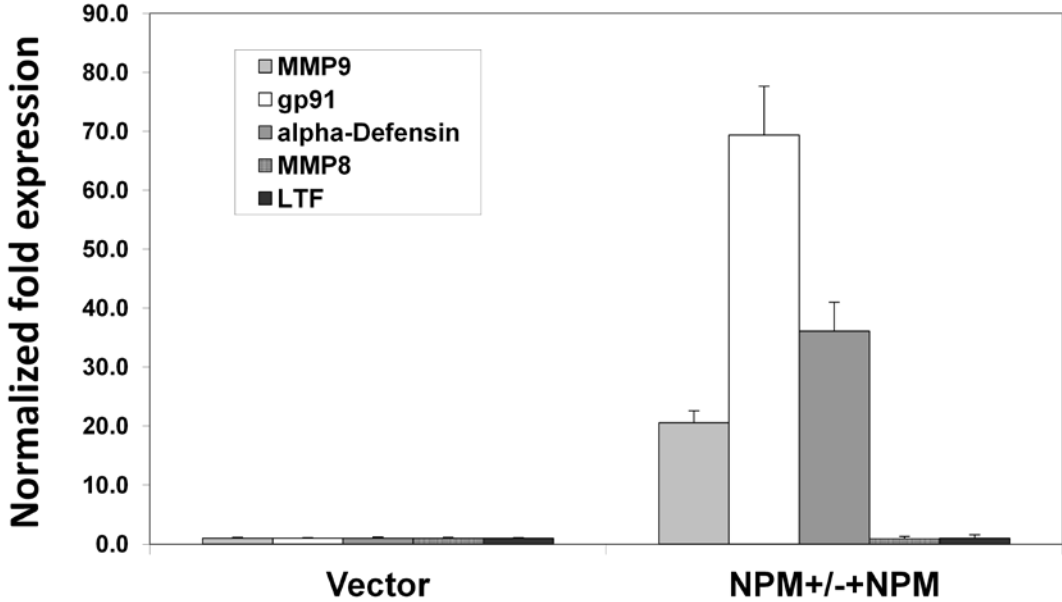

Supplemental Table 1

| Name             | Sense                      | Anti-sense                     |
|------------------|----------------------------|--------------------------------|
| NPM              | 5' GGGGCTTTGAAATTACACCA 3' | 5' GAGCAGATCGCTTTCCAGAC 3'     |
| c/EBP $\alpha$   | 5'TGGACAAGAACAGCAACGAG3'   | 5'CCTTGACCAAGGAGCTCTCA3'       |
| c/EBP $\alpha$   | 5'GAGTCGGCCGACTTC3'        | 5'AAGGCGGCCGGGTCGATG3'         |
| c/EBP $\epsilon$ | 5' TCTCCGCTACATCGAGTCT 3'  | 5' CCTATCTGGCCAAATGTGT 3'      |
| LACTOFERRIN      | 5' GGAGCCTTGAGGTGTCTGAG 3' | 5' CCAGGTGGCACTCCTTGAT 3'      |
| DEFENSIN         | 5' CCAGGTCCAGGCTGATTCTA 3' | 5' CCTTCTGCAGGTTCCATTC 3'      |
| MMP9             | 5' CATTGCGTGGATAAGGAGT 3'  | 5' ACCTGGTTCACCTCATGGTC 3'     |
| MMP8             | 5' AACGGTCTTCAGGCTGCTTA 3' | 5' AATGGCTTGGAACCTCCTTG 3'     |
| gp91Phox         | 5' GACTGCGGAGAGTTTGAAG 3'  | 5' GGTGATGACCACCTTTTGCT 3'     |
| GMCSFR           | 5'CACCGCGTCTGTAACCTT3'     | 5'GCACCTTGACCTTGTGACCT3'       |
| GCSFR            | 5'GAGCTGTGGACACATCGAGA3    | 5'AGGAAGGCCTGGGTGTAGTT3'       |
| $\beta$ -ACTIN   | 5' GTGGGCCGCTCTAGGCACCA 3' | 5'CGGTTGGCCTTAGGGTTCAGGGGGG 3' |

Supplemental Table 1
